# Supplementary material for: Maternal Protein Restriction Alters the Renal Ptger1 DNA Methylation State in SHRSP Offspring
Source: PubMed Central journal article supplement (PMC6213780; doi:10.3390/nu10101436), 2018-10-05
Supplement: nutrients-10-01436-s001.pdf [file nutrients-10-01436-s001.pdf]

## Supplemental Information

**Table S1.** Primers used in the real-time(RT)-PCR analysis of *ptger1*-related gene expression.

| <b>Gene</b>                    | <b>Forward primer</b>          | <b>Reverse primer</b>           |
|--------------------------------|--------------------------------|---------------------------------|
| <i>enaca</i>                   | 5'-AAGTGGACCGGAAGGACTGG-3'     | 5'-CCTGGACAGAATGTTGATGTAATGG-3' |
| <i>enac<math>\beta</math></i>  | 5'-TTGCCTGCTGGGGAGA-3'         | 5'-GGTCATCTTATACTGGGTGTCGTTG-3' |
| <i>enac<math>\gamma</math></i> | 5'-GAAATGGTTGCTGAATGTTCTCAC-3' | 5'-TACTGTTGGCTGGGCTCTCC-3'      |
| <i>ptger1</i>                  | 5'-AGTAGCTGGAGTGGGCAGCA-3'     | 5'-GCTCATATCAGTGGCCAAGAGG-3'    |
| <i>ptges3</i>                  | 5'-AGATTACCAGAAGTAGACGGAGCA-3' | 5'-CCAGGCGATGATACCACTCTTTAC-3'  |

**Table S2.** Liquid consumption, urine volume, and organ weights exhibited by offspring provided with drinking water (W), and either a high (CN) or low (LP)-protein diet.

| <b>Parameter</b>                    | <b>CN-W</b> | <b>LP-W</b> |
|-------------------------------------|-------------|-------------|
| Drinking water consumption (ml/day) | 25.3 ± 1.04 | 24.5 ± 1.49 |
| Urine volume (ml/day)               | 10.4 ± 0.65 | 10.8 ± 0.30 |
| Body weight (g)                     | 301 ± 3.30  | 288 ± 5.82  |
| Kidney weight (g)                   | 2.48 ± 0.04 | 2.45 ± 0.05 |
| Brain weight (g)                    | 1.90 ± 0.02 | 1.86 ± 0.02 |
| Heart weight (g)                    | 1.15 ± 0.01 | 1.15 ± 0.02 |

Values are expressed as the mean ± standard error (n=7). CN, 20%-Casein diet; LP, 9%-Casein diet.

**Table S3.** Liquid consumption, urine volume, and organ weights in exhibited by offspring provided with a 1% saline drinking solution (S), and either a high (CN) or low (LP)-protein diet.

| <b>Parameter</b>                              | <b>CN-S</b> | <b>LP-S</b>  |
|-----------------------------------------------|-------------|--------------|
| Saline drinking solution consumption (ml/day) | 41.4 ± 1.5  | 48.9 ± 3.0   |
| Urine volume (ml/day)                         | 20.8 ± 3.3  | 25.3 ± 4.8   |
| Body weight (g)                               | 255 ± 3.30  | 264 ± 7.93   |
| Kidney weight (g)                             | 2.00 ± 0.02 | 2.13 ± 0.15  |
| Brain weight (g)                              | 1.87 ± 0.01 | 1.90 ± 0.03  |
| Heart weight (g)                              | 1.03 ± 0.02 | 1.11 ± 0.07* |

Values are expressed as means ± standard error (n=7-8). \*p < 0.05 vs. the CN-S group according to a Student's t-test. ).

CN, 20%-Casein diet; LP, 9%-Casein diet.

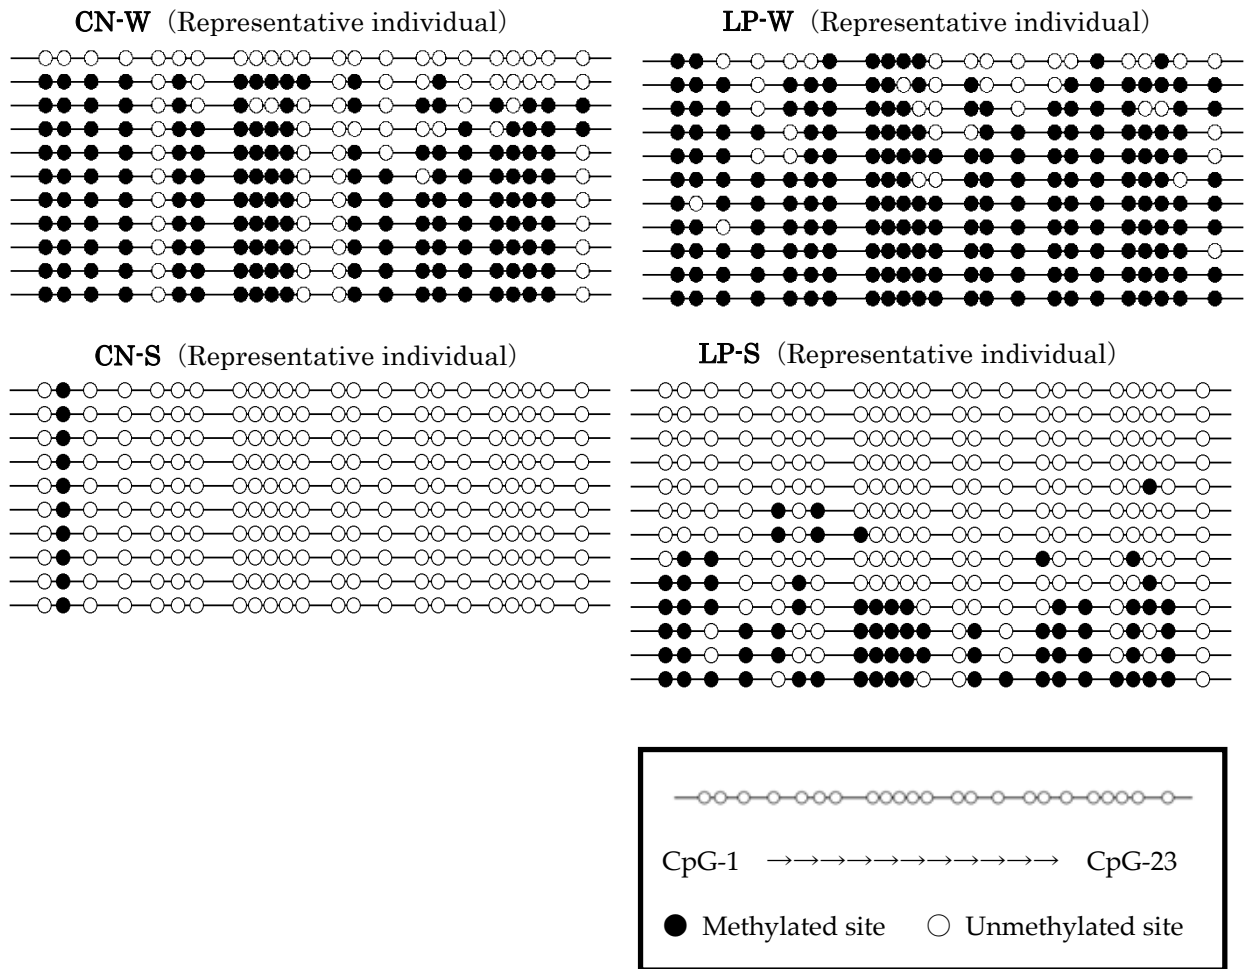

**Figure S1.** *ptger1* DNA methylation status according to the conducted bisulfite-sequencing analysis.

CN, 20%-Casein diet; LP, 9%-Casein diet; S, 1% saline drinking solution; W, drinking water.

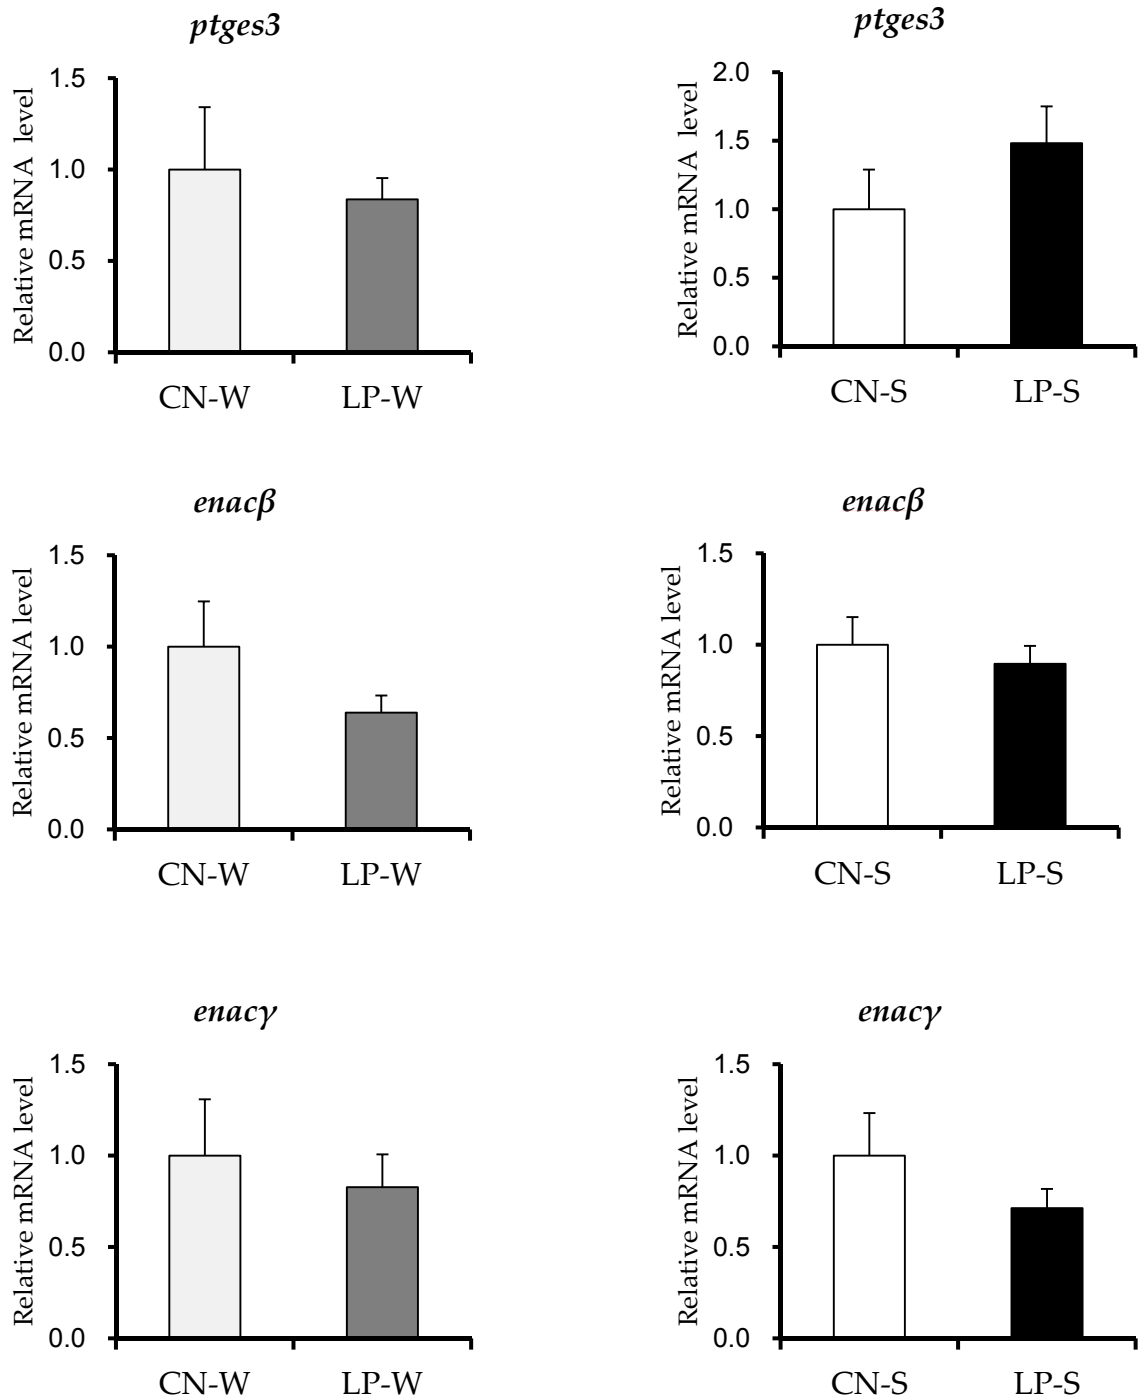

**Figure S2.** Relative renal mRNA expression of *ptger1*-related genes. Values are expressed as the mean  $\pm$  standard error (n=7–8). CN, 20%-Casein diet; LP, 9%-Casein diet; S, 1% saline drinking solution; W, drinking water.
